1 **Universal gene co-expression network reveals receptor-like protein genes**  
2 **conferring broad-spectrum resistance in pepper (*Capsicum annuum* L.)**

3 Running title: conserved CaRLPs in GCN conferring broad-spectrum resistance

4

5

6 Won-Hee Kang<sup>1\*</sup>, Junesung Lee<sup>2</sup>, Namjin Koo<sup>3</sup>, Ji-Su Kwon<sup>2</sup>, Boseul Park<sup>2</sup>, Yong-Min Kim<sup>3,4</sup>,  
7 Seon-In Yeom<sup>1,2\*</sup>

8 <sup>1</sup> Institute of Agriculture & Life Science, Gyeongsang National University, Jinju, 52828, Republic of  
9 Korea

10 <sup>2</sup> Department of Horticulture, Division of Applied Life Science (BK21 four), Gyeongsang National  
11 University, Jinju, 52828, Republic of Korea

12 <sup>3</sup> Korean Bioinformation Center, Korea Research Institute of Bioscience and Biotechnology, Daejeon,  
13 34141, Republic of Korea

14 <sup>4</sup> Genome Engineering Research Center, Korea Research Institute of Bioscience and Biotechnology,  
15 Daejeon, 34141, Republic of Korea

16

17

18 \*Corresponding author:

19 Seon-In Yeom (E-mail: [sunin78@gnu.ac.kr](mailto:sunin78@gnu.ac.kr))

20 Won-Hee Kang (E-mail: [wh81kang@gmail.com](mailto:wh81kang@gmail.com))

21

22 **ABSTRACT**

23 Receptor-like proteins (RLPs) on the plant cell surface have been implicated in immune  
24 responses and developmental processes. Although hundreds of *RLP* genes have been  
25 identified in plants, only a few RLPs have been functionally characterized in a limited number  
26 of plant species. Here, we identified *RLPs* in the pepper (*Capsicum annuum*) genome, and  
27 performed comparative transcriptomics coupled with the analysis of conserved gene co-  
28 expression networks (GCNs) to reveal the role of core RLP regulators in pepper–pathogen  
29 interactions. A total of 102 RNA-seq datasets of pepper plants infected with four pathogens  
30 were used to construct CaRLP-targeted GCNs (CaRLP-GCN). All resistance-responsive  
31 CaRLP-GCNs were merged to construct a universal GCN. Fourteen hub *CaRLPs*, tightly  
32 connected with defense related gene clusters, were identified in eight modules. Based on  
33 the CaRLP-GCNs, we experimentally tested whether hub *CaRLPs* in the universal GCN are  
34 involved in biotic stress response. Of the nine hub *CaRLPs* tested by virus-induced gene  
35 silencing (VIGS), three genes (*CaRLP264*, *CaRLP277*, and *CaRLP351*) showed defense  
36 suppression with less hypersensitive response (HR)-like cell death in race-specific and non-  
37 host resistance response to viruses and bacteria, respectively, and consistently enhanced  
38 susceptibility to *Ralstonia solanacearum* and/or *Phytophthora capsici*. These data suggest  
39 that key *CaRLPs* exhibit conserved functions in response to multiple biotic stresses and can  
40 be used for engineering of a plant with broad-spectrum resistance. Altogether, we show that  
41 generation of a universal GCN using comprehensive transcriptome datasets could provide  
42 important clues for uncovering genes involved in various biological processes.

43

## 44 INTRODUCTION

45 Plants employ extra- and intracellular immune signaling to protect themselves  
46 against pathogens<sup>1,2</sup>. The first layer of plant immunity, known as pattern-triggered immunity,  
47 is activated upon the perception of pathogen- or microbe-associated molecular patterns  
48 (PAMPs or MAMPs) by plant cell surface-localized pattern recognition receptors (PRRs).  
49 PRRs sense diverse pathogens including bacteria, fungi, oomycetes and parasitic plants,  
50 and are involved in the immune signaling complex and network<sup>3</sup>. Recently, plant PRRs have  
51 been successfully used to confer broad-spectrum resistance in potato (*Solanum*  
52 *tuberosum*)<sup>4,5</sup> and in *Nicotiana benthamiana* and tomato (*Solanum lycopersicum*) (Lacombe  
53 et al., 2010), and have been considered for conferring broad-spectrum disease resistance in  
54 other crops.

55 Plant PRRs are distinguished into two main classes, depending on their cytoplasmic  
56 kinase domains: receptor-like kinases (RLKs) and receptor-like proteins (RLPs). RLKs  
57 contain an extracellular domain, a single transmembrane domain and a cytoplasmic domain,  
58 whereas RLPs lack the cytoplasmic kinase domain but carry a short cytoplasmic tail. RLPs  
59 play crucial roles in plant immunity against pathogens. The first RLPs, designated as *Cf*  
60 genes, were identified in tomato, which imparted resistance to *Cladosporium fulvum*  
61 isolates<sup>6-9</sup>. Since then, several RLPs have been shown to have function in plant defense,  
62 mostly in Solanaceous plants and *Arabidopsis thaliana*<sup>5,10-18</sup>. In addition, RLPs are also  
63 involved in plant development<sup>19-21</sup>. A number of genes encoding RLPs have been identified  
64 with the completion of plant genome project<sup>22-27</sup>; however, relatively fewer genes have been  
65 functionally characterized to date.

66 Based on the recent advances in the sequencing technology, along with the decline  
67 in the cost of sequencing, RNA-seq have been widely utilized in plants, producing massive  
68 amounts of data. However, the identification and manipulation of information of interest from  
69 large integrated datasets remain challenging. Since functionally associated genes often  
70 show transcriptional co-regulation, gene co-expression networks (GCNs) present an  
71 important resource for the identification of novel genes within a given biological process-  
72 regulating module. Thus, the analysis of GCNs could be a powerful approach for predicting  
73 gene functions and isolating modules involved in specific biological process across large-  
74 scale gene expression data<sup>28-31</sup>. In recent years, GCN analysis has been successfully used  
75 to discover stress-responsive genes in plants<sup>32-34</sup>. Additionally, several research groups  
76 recently performed comparative and combined analyses of GCNs in time-series experiments  
77 conducted under various conditions and with multiple treatments, across different species  
78 and kingdoms<sup>35-39</sup>. These studies were used to identify hub genes and infer their roles in

79 biological processes. However, that are less well investigated compared with certain model  
80 species because of their extreme complexity and limited resources.

81 Chili pepper (*Capsicum* spp.), a member of the Solanaceae family, is an important  
82 vegetable crop worldwide. However, pepper production is threatened by pathogens such as  
83 fungi, bacteria, viruses, insects, and nematodes. Development of pathogen resistant  
84 cultivars is one of the best approaches for controlling infection in pepper. Although multiple  
85 reference genomes and transcriptome datasets of pepper have been published recently<sup>40-43</sup>,  
86 the molecular mechanism underlying plant immunity remains unclear. Therefore, the  
87 identification and characterization of genes involved in plant defense using comprehensive  
88 transcriptome data is critical. In this study, we identified 438 RLP genes in the chili pepper  
89 genome through phylogenetic analysis and comparative transcriptomic analysis of 102 RNA-  
90 seq datasets of chili pepper plants challenged with four different pathogens. In addition, we  
91 constructed CaRLP-targeted GCNs (CaRLP-GCN) using comprehensive RNA-seq datasets  
92 and, merged the resistant-responsive GCNs to develop a universal CaRLP-GCN. Using this  
93 GCN, we identified 14 putative RLP hub genes belonging to eight modules. Loss-of-function  
94 analysis of three *CaRLPs* (*CaRLP264*, *CaRLP277*, and *CaRLP351*) validated the broad  
95 immune response to pathogens. The silencing of each of the three *CaRLPs* significantly  
96 reduced the broad-spectrum resistance against viruses, bacteria, and oomycetes. Overall,  
97 this study demonstrates the successful characterization of novel genes via the construction  
98 of a universal GCN from large RNA-seq datasets, and provides key insights into the broad-  
99 spectrum resistance in plants.

100

101

## 102 RESULTS

### 103 Genome-wide identification and classification of RLPs in pepper genome

104 A total of 438 RLP-encoding genes were identified in the *Capsicum annuum*  
105 genome by excluding redundant sequences and genes encoding NB-ARC or kinase domain-  
106 containing proteins, and by validating the RLP structure (see Materials and Methods for  
107 details). All of the RLP-encoding genes were renamed according to their chromosomal  
108 positions (Fig. 1a and Supplementary Table S1). Details of *CaRLP* genes are summarized in  
109 Supplementary Table S1.

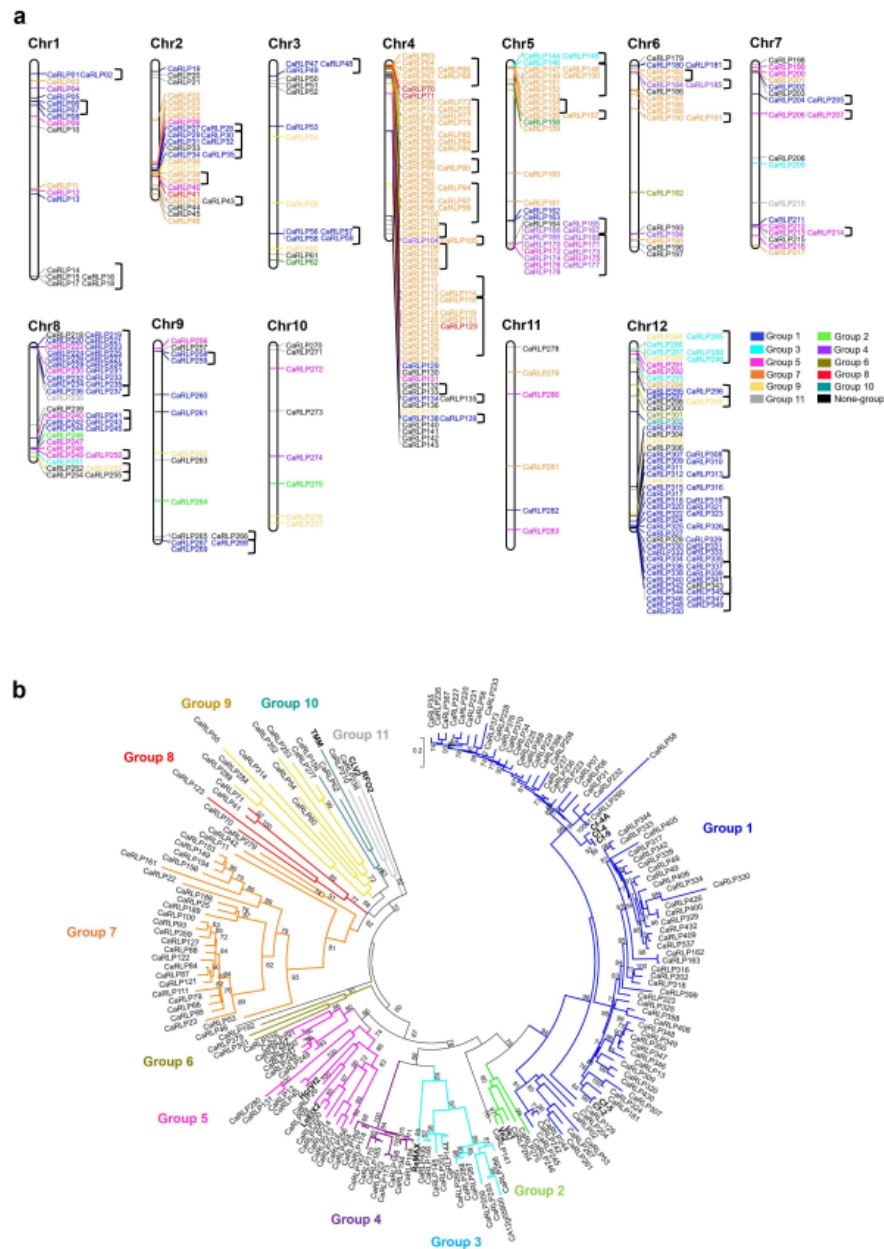

110

111 **Fig. 1. Phylogenetic analysis and chromosomal locations of *CaRLPs*.** (a) Physical location of  
112 *CaRLP* genes on pepper chromosomes. A total of 350 *CaRLPs* were located on 12 chromosomes,  
113 while 88 *CaRLPs* were assigned to pepper scaffolds. The chromosome and scaffold numbers are  
114 indicated at the top of each chromosome. *CaRLPs* are colored according to their phylogenetic group.  
115 Black square brackets on the right side of gene IDs indicate the physical gene clusters of *CaRLPs* on  
116 chromosomes. (b) Phylogenetic tree of *CaRLPs* constructed using the maximum-likelihood method  
117 using PhyML. Bootstrap values over 60 are indicated above branches. Clades containing known *RLP*  
118 genes are indicated by the *RLP* gene names at the end of the clade.

119

120 Phylogenetic analysis and sequence similarity-based clustering methods<sup>24,44</sup>  
121 classified 364 out of 438 *CaRLPs* into 11 groups; the remaining 74 *CaRLPs* were not  
122 classified into any group and were defined as singletons (Fig. 1b and Supplementary Table  
123 S1). The majority of *RLPs* were assigned to two groups (1 and 7). Group 1 was the largest  
124 group consisting of comprising 153 genes, including tomato *SICf* genes and their homologs  
125 in pepper. Group 7 was the second largest group comprising 118 *CaRLP* genes, without  
126 known genes. Next, to explore the evolutionary relationships of *CaRLPs* with *SIRLPs*<sup>24</sup> and  
127 *AtRLPs*<sup>22</sup>, we conducted phylogenetic analysis of the amino acid sequence of conserved C3-  
128 D domain of these *RLPs* (Supplementary Fig. S1). The majority of *CaRLPs* clustered  
129 together with *SIRLPs*, whereas most of the *AtRLPs* grouped separately, forming two  
130 *Arabidopsis*-specific clades (Supplementary Fig. S1). These results suggest that the *CaRLP*  
131 gene family underwent expansion after divergence from the common ancestor of  
132 *Arabidopsis* and *Solanaceae* species.

133

#### 134 **Chromosomal location, physical cluster, and conserved motif analyses**

135 Of the 438 *CaRLP* genes identified in this study, 350 mapped on to 12  
136 chromosomes, while 88 were assigned to unmapped scaffolds (Fig. 1a). Most of the  
137 *CaRLPs* belonging to the same phylogenetic group were closely clustered on a given  
138 chromosome. Next, we performed physical cluster analysis to thoroughly investigate the  
139 chromosomal distribution of *CaRLPs*. The results revealed 54 clusters on pepper  
140 chromosomes containing 227 genes (Fig. 1a and Supplementary Table S2). Each of these  
141 clusters spanned a physical distance of 0.7–885 kb. Large clusters (>200 kb) were located  
142 on chromosomes 1, 4, 5, 8, and 12, and no cluster was identified on chromosomes 10 and  
143 11. Of all the *CaRLPs* in each group, those with large numbers (Groups 1 and 7) formed  
144 mostly physical clusters. To better understand the *CaRLP* gene family, we examined  
145 conserved motifs in *CaRLP* proteins. A total of 20 distinct motifs were predicted among all

146 438 CaRLPs and known RLPs (Fig. S2 and Supplementary Table S3). Most motifs were  
147 found to encode the leucine-rich repeat (LRR) domain, while motif 9 encoded the  
148 transmembrane region. Most of the closely related genes in the same phylogenetic group  
149 exhibited common motif compositions. Taken together, these data indicate that CaRLPs  
150 belonging to the same phylogenetic group share conserved motifs, similar protein domain  
151 compositions and similar chromosomal locations.

152

### 153 **Expression analysis of CaRLPs in response to biotic stresses**

154 RLPs perform crucial roles in plant disease resistance. However, little is known  
155 about the possible function of CaRLPs in defense response. To further understand the role  
156 of *CaRLP* genes in plant defense, we investigated the expression patterns of *CaRLPs*  
157 showing differential expression between uninoculated (control) and pathogen-challenged  
158 pepper plants; these genes are hereafter referred to as differentially expressed *CaRLP*  
159 genes (*CaRLP*-DEGs). These DEGs were obtained from 63 previously published RNA-seq  
160 datasets of pepper plants infected with three different viruses including *Tobacco mosaic virus*  
161 (TMV) pathotype P0 (TMV-P0), TMV pathotype P2 (TMV-P2) and *Pepper mottle virus*  
162 (PepMoV)<sup>43,45</sup>. In addition, to determine the changes in *CaRLP* expression at an early stage  
163 of oomycete infection, we generated six-timepoint RNA-seq datasets from three biological  
164 replicates of *P. capsici*-inoculated and control pepper plants (Supplementary Table S4). Thus,  
165 we examined a total of 102 RNA-seq datasets to analyze the expression of *CaRLPs*  
166 (Supplementary Table S5). Pepper accession 'CM334,' which was used for RNA-seq  
167 analysis in this study, is known to be resistant to TMV-P0, PepMoV, and *P. capsici* but  
168 susceptible to TMV-P2<sup>45,46</sup>.

169 Of the 438 *CaRLPs*, 35 were differentially expressed between TMV-P0-inoculated  
170 and control plants, and 6 were differentially expressed between PepMoV-inoculated and  
171 control plants (fold-change  $\geq 2$ ) at one or more time points (Supplementary Fig. S3, and  
172 Supplementary Table S6). However, no *CaRLP*-DEG was identified between TMV-P2-  
173 inoculated and control plants, susceptible response (Supplementary Fig. S3). Heat map  
174 analysis divided the identified DEGs into four hierarchical clusters (Fig. 2a and 2b). In each  
175 cluster, *CaRLP*-DEGs identified between TMV-P0 vs. control treatments showed dynamic  
176 expression patterns, unlike those identified in TMV-P2 vs. control and PepMoV vs. control  
177 treatments. Cluster 1 was enriched in *CaRLPs* down-regulated in TMV-P0- and PepMoV-  
178 infected plants at 72 h post-inoculation (hpi). *CaRLP*-DEGs in clusters 2, 3, and 4 were up-  
179 regulation at later time points, mainly in TMV-P0-inoculated plants. These results indicate  
180 that several *CaRLPs* are involved in the response to viral pathogens.

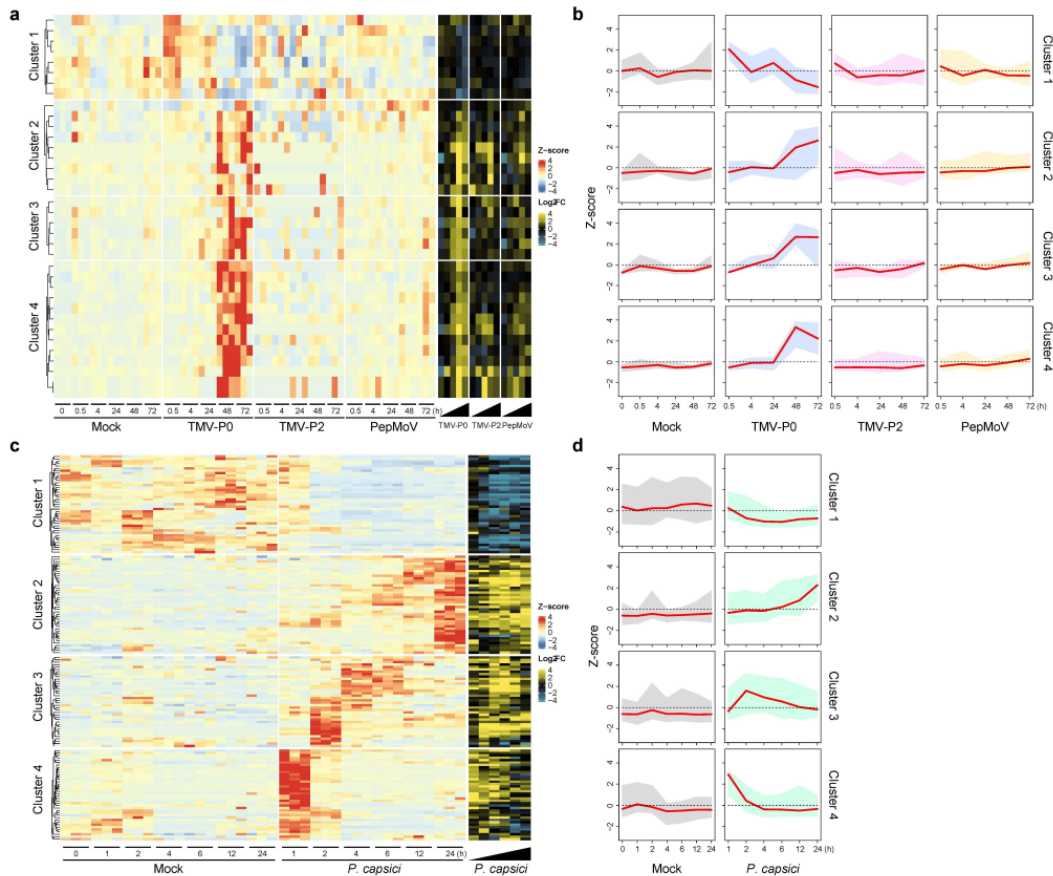

181

182 **Fig. 2. Analysis of *CaRLP* expression patterns during pathogen infection.** (a) Heat map  
183 displaying the time-course expression profiles of differentially expressed genes (DEGs) identified in  
184 plants treated with TMV-P0, TMV-P2, and PepMoV. The left hand side (red to blue scale) and right  
185 hand side (yellow to blue scale) of the heatmap indicate DEGs with z-score and log<sub>2</sub>(fold-change; FC)  
186 values, respectively. (b) Time-course analysis of the expression pattern of *CaRLP*-DEGs within  
187 clusters. Each cluster represents the hierarchical clustering numbers in the heatmap shown in (a).  
188 Numbers represent the mean z-score of DEGs, and red lines indicate median z-score within a cluster.  
189 (c) Heat map illustrating the time-course expression profiles of *CaRLP*-DEGs identified in plants  
190 treated with *P. capsici*. (d) Expression profiling of *CaRLP*-DEGs in clusters under *P. capsici* infection.

191

192 Next, we compared the transcriptome of *P. capsici*-inoculated plants at 1, 2, 4, 6, 12,  
193 and 24 hpi with that of control plants, and identified 158 *CaRLP*-DEGs (fold-change  $\geq 2$ ) at  
194 one or more time points (Fig. 2c, 2d, and Supplementary Table S7). This number was much  
195 higher than that obtained from virus-inoculated plants. These 158 *CaRLPs* were also divided  
196 into four clusters by hierarchical clustering analysis. *CaRLP*-DEGs overrepresented in  
197 clusters 1 and 4 were down-regulated, whereas those in cluster 2 were up-regulated at later  
198 time points. Genes in cluster 3 were highly expressed at 1 hpi, but their expression



199 decreased over time. A total of 31 *CaRLPs* were identified in both virus- and *P. capsici*-  
200 inoculated plants, and were referred to as common *CaRLP*-DEGs (Supplementary Table S6  
201 and S7). Most of these 31 *CaRLP*-DEGs showed an increase in expression over time in both  
202 virus- and *P. capsici*-inoculated plants, and were classified into clusters 2, 3, and 4 in virus  
203 RNA-seq data and into clusters 2 and 3 in *P. capsici* RNA-seq data (Fig. 2). Taken together,  
204 comprehensive transcriptome profiling supported that *CaRLPs* are involved in an immune  
205 response against biotic stresses including viruses and oomycetes.

206

### 207 **Construction of comprehensive co-expression networks of *CaRLPs* using RNA-seq** 208 **data of pathogen-challenged pepper plants**

209 To understand functional implications of *CaRLPs* expressed during pathogen  
210 infection, *CaRLP*-targeted GCNs were constructed using all 102 RNA-seq datasets  
211 (described above). Four GCNs involving *CaRLPs* as hub genes were identified, one each  
212 from the RNA-seq data of TMV-P0-, TMV-P2-, PepMoV-, and *P. capsici*-challenged plants;  
213 these *CaRLP*-GCNs consisted of 4,041 nodes with 11,825 edges, 1,073 nodes with 1,194  
214 edges, 3,732 nodes with 7,933 edges and 10,878 nodes with 84,255 edges, respectively  
215 (Fig. 3a, 3b, 3c and 3d). Gene ontology (GO) enrichment analysis was performed for the  
216 modules in each of the GCNs identified. Various GO terms were enriched in the molecular  
217 function (MF), cellular component (CC) and biological process (BP) categories. Interestingly,  
218 two GO terms, “oxidation-reduction process” and “cellular oxidation detoxification,” were  
219 overrepresented in the BP category in the three pathogen treated datasets of ‘CM334,’ which  
220 showed resistance response to TMV-P0, PepMoV, and *P. capsici* (Fig. 3e). These two  
221 biological processes are known to be involved in plant immune response: reduction-  
222 oxidation changes occur in response to pathogen invasion and subsequently activate the  
223 plant immune function, i.e., HR, a programmed execution of challenged plant cells<sup>47</sup>; cellular  
224 oxidation detoxification has also been reported in plants under stress<sup>48</sup>. The GO term  
225 “phosphorylation” was enriched in the GCN from TMV-P2 treated RNA-seq dataset.  
226 Previously,<sup>49</sup> reported that phosphorylation is induced upon plant virus infection. These  
227 findings suggest that *CaRLPs* and the corresponding genes in GCNs are involved in biotic  
228 stress response in pepper. In addition, we carried out Kyoto Encyclopedia of Genes and  
229 Genomes (KEGG) pathway analysis of genes belonging to each GCN. The results showed  
230 enrichment of pathways associated with plant immune response such as “biosynthesis of  
231 antibiotics,” “phenylalanine metabolism” and “phenylpropanoid biosynthesis” in TMV-P0-,  
232 PepMoV-, and *P. capsici*-specific *CaRLP*-GCNs, respectively (Supplementary Fig. S4).  
233 Taken together, GO and KEGG enrichment analyses of GCNs showed that genes connected

234 with CaRLPs in GCNs are potentially involved in immune response in pepper.

235

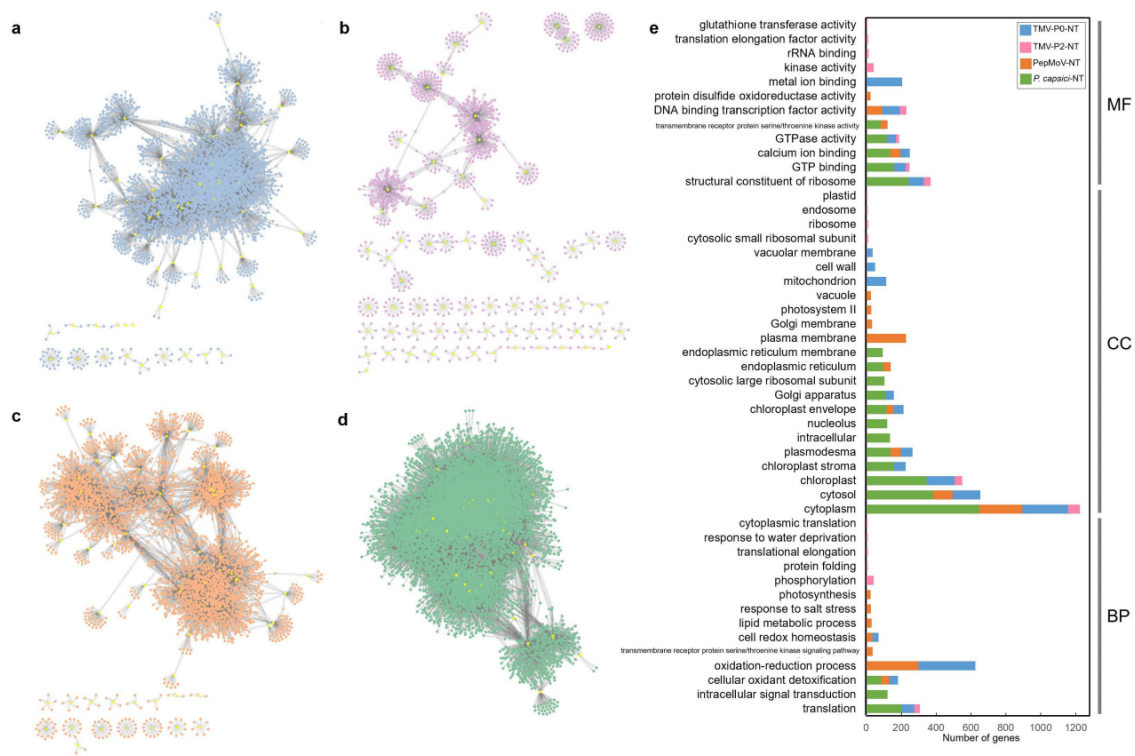

236

237 **Fig. 3. Analysis of the co-expression network (GCN) of CaRLPs identified using RNA-seq data**  
 238 **of biotic stress treated pepper plants.** (a–d) GCN comprising CaRLP hub genes identified in plants  
 239 treated with TMV-P0 (a), TMV-P2 (b), PepMoV (c) and *P. capsici* (d). Yellow dots in the GCN indicate  
 240 CaRLPs. (e) Top 20 GO terms significantly enriched in each of the four GCNs. The top 20 GO terms  
 241 ( $P < 0.01$ ) were selected in order of the largest number of genes from each of the four GCNs. BP,  
 242 biological process; CC, cellular component; MF, molecular function.

243

### 244 Identification of biotic stress-responsive core CaRLPs

245 To identify CaRLPs confer resistance to multiple pathogens, we merged the CaRLP-  
 246 GCNs derived from the RNA-seq datasets of TMV-P0-, PepMoV-, and *P. capsici*-infected  
 247 plants, thus constructing a universal resistance-responsive GCN (hereafter referred to as  
 248 RN). The RN contained eight modules (named as RN1–8), with a total 14 hub CaRLPs (Fig.  
 249 4a).

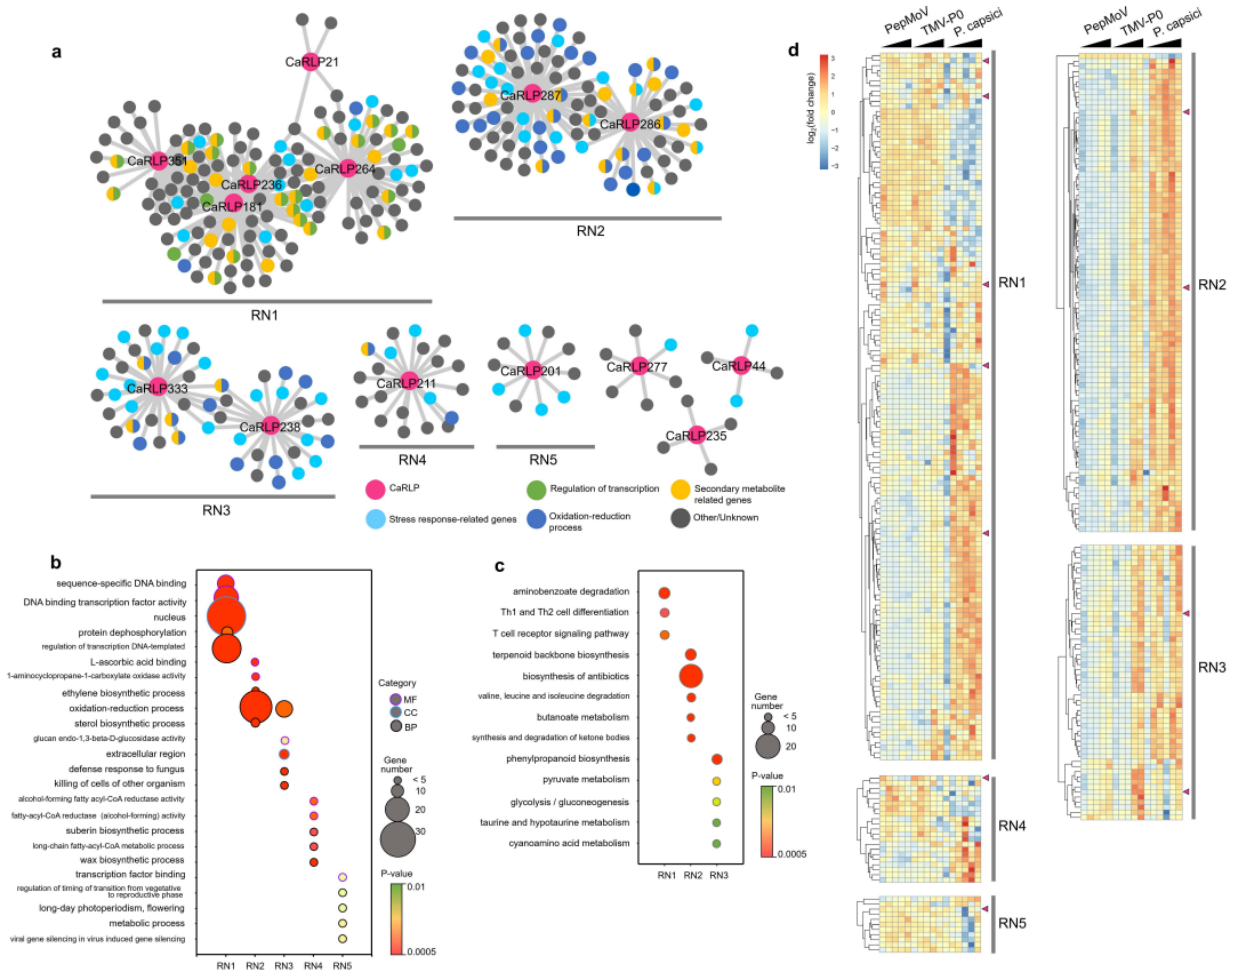

250

251 **Fig. 4. Identification of biotic stress-responsive core CaRLPs in a universal GCN** (a) Intersection  
 252 of three GCNs of PepMoV-, TMV-P0- or *P. capsici*-infected plants. The co-expression network  
 253 modules containing more than ten nodes were designated as RN1–RN5. Magenta nodes represent  
 254 CaRLPs, and other colored nodes represent their annotated functions by GO analysis. (b) Top 5 GO  
 255 categories enriched ( $P < 0.01$ ) in five modules (RN1 to RN5). The Y-axis and X-axis in the bubble plot  
 256 represent the GO category and different modules, respectively. The purple, blue, and black borders of  
 257 the circle represent molecular function (MF), cellular component (CC), and biological process (BP),  
 258 respectively. The size and color of each bubble represent the number of DEGs and  $P$ -value for each  
 259 category, respectively. (c) Bubble plot showing the results of KEGG pathway enriched analysis of five  
 260 co-expression modules (RN1 to RN5). The Y-axis and X-axis in the bubble plot represent the enriched  
 261 KEGG pathways and network modules, respectively. The size and color of each bubble represent the  
 262 number of DEGs and  $P$ -value for each category, respectively. (d) Expression profiles of genes in  
 263 RN1–RN5 modules. Expression values were normalized relative to the value of control samples  
 264 (Mock). Module names are indicated on the right hand side of the heatmap. Magenta triangles on the  
 265 right side of the heat map indicate hub CaRLPs in each module. Black triangles on the top of the heat  
 266 map represent the time-course of each pathogen infection.

267

268 Next, we performed GO and KEGG enrichment analyses and expression analysis to  
269 determine the biological processes and pathways affected during the plant immune  
270 responses of *CaRLPs* and associated pepper genes in RN. Thus, we focused on GO terms  
271 belonging to the BP category in these modules. Stress-related genes were enriched in RN  
272 modules (Fig. 4a and 4b). Notably, genes involved in stress response were higher enriched  
273 in RN2 and RN3 modules. We focused on GO terms belonging to the BP category in these  
274 modules. GO terms related plant defense mechanisms such as “oxidation-reduction process,”  
275 “sterol biosynthetic process” and “ethylene biosynthetic process” were highly enriched in the  
276 RN2 module, and “oxidation-reduction process,” “defense response to fungus,” and “cellular  
277 oxidant detoxification” were highly enriched in RN3. As mentioned above, oxidation-  
278 reduction and cellular oxidant detoxification occur in plants in response to pathogen attack.  
279 Most pathogenic fungi and oomycetes uptake sterols from the external environment, most  
280 likely from the host cell membrane, during pathogenesis<sup>50</sup>. In addition, ethylene acts as a  
281 signaling molecule during stress<sup>51</sup>. The results of KEGG pathway analysis revealed the  
282 enrichment of defense related pathways such as “biosynthesis of antibiotics,” “terpenoid  
283 backbone biosynthesis,” and “phenylpropanoid biosynthesis” in the RN (Fig. 4c). “Terpenoid  
284 backbone biosynthesis” and “phenylpropanoid biosynthesis” pathways produce secondary  
285 metabolites, which are involved in plant defense<sup>52</sup>. Taken together, these findings support  
286 that genes co-expressed with *CaRLPs* in the RN are involved in biotic stress response. We  
287 also examined the expression profiles of genes in the RN (Fig. 4d). Based on expression  
288 patterns, genes in RN1 were divided into two types: those highly up-regulated in response to  
289 both PepMoV and TMV-PO, and those up-regulated mainly in response to *P. capsici*. Genes  
290 in RN2 and RN3 modules were up-regulated in response to *P. capsici*. The expression of  
291 genes in each module was significantly correlated, indicating that these genes were tightly  
292 connected each other. Thus, these results suggest that hub *CaRLPs* in the RN play a role in  
293 resistance to multiple biotic stresses.

294

## 295 **Functional validation of core *CaRLPs* involved in HR-like response to pathogen** 296 **invasion**

297 We hypothesized that core *CaRLPs*, i.e., hub genes in universal GCN, are involved  
298 in resistance response to biotic stresses. To decipher the core *CaRLPs* of the GCN, which  
299 potentially function in biotic stress response, we performed loss-of-function analysis of nine  
300 *CaRLP* genes; each of these genes was silenced by virus-induced gene silencing (VIGS) in  
301 the pepper cultivar ‘Nockwang.’ These nine genes included 2 genes not belonging to the RN  
302 (*CaRLP35* and *71*) and 7 core *CaRLPs* belonging to the RN (*CaRLP181*, *211*, *264*, *277*, *286*,

303 287 and 351); the remaining 7 of the 14 core *CaRLPs* were excluded from this analysis, as  
304 their nucleotide sequence was none-specific for VIGS assay. VIGS constructs were  
305 constructed by cloning a sequence unique to each of the nine *CaRLPs* into a *Tobacco rattle*  
306 *virus* (TRV) vector; notably, because *CaRLP286* and 287 exhibit high level of sequence  
307 similarity, both these genes could be silenced using a single construct containing a  
308 sequence common to the two genes. The expression level of each *CaRLP* was significantly  
309 lower in *CaRLP*-silenced pepper plants than in the *TRV2-GFP* control (Supplementary Fig.  
310 S5), although no significant phenotypic difference was observed between *TRV2-CaRLP* and  
311 control plants (Supplementary Fig. S6), indicating that the eight *CaRLP* constructs did not  
312 affect the growth and development of pepper plants.

313 To investigate whether the silencing of *CaRLPs* affects HR, a form of programmed  
314 cell death (PCD), upon TMV-P0 infection, we simultaneously inoculated *CaRLP*-silenced  
315 pepper plants and control plants with TMV-P0, and monitored their phenotypes. The number  
316 of HR lesions on TMV-P0-inoculated leaves was significantly lower in *TRV2-CaRLP264*, -  
317 *277*, *-286/287* and *-351* lines than in *TRV2-GFP* plants at 48 hpi (Fig. 5a). The level of HR in  
318 these four *CaRLP*-silenced lines was decreased by 0.22–0.72-fold compare with that in  
319 control plants (Fig. 5b). By contrast, the silencing of other *CaRLP* genes did not cause any  
320 significant change in the number of HR lesions. These results suggest that these *CaRLP*  
321 genes are involved in the activation of defense mechanisms and PCD upon pathogen  
322 infection in pepper.

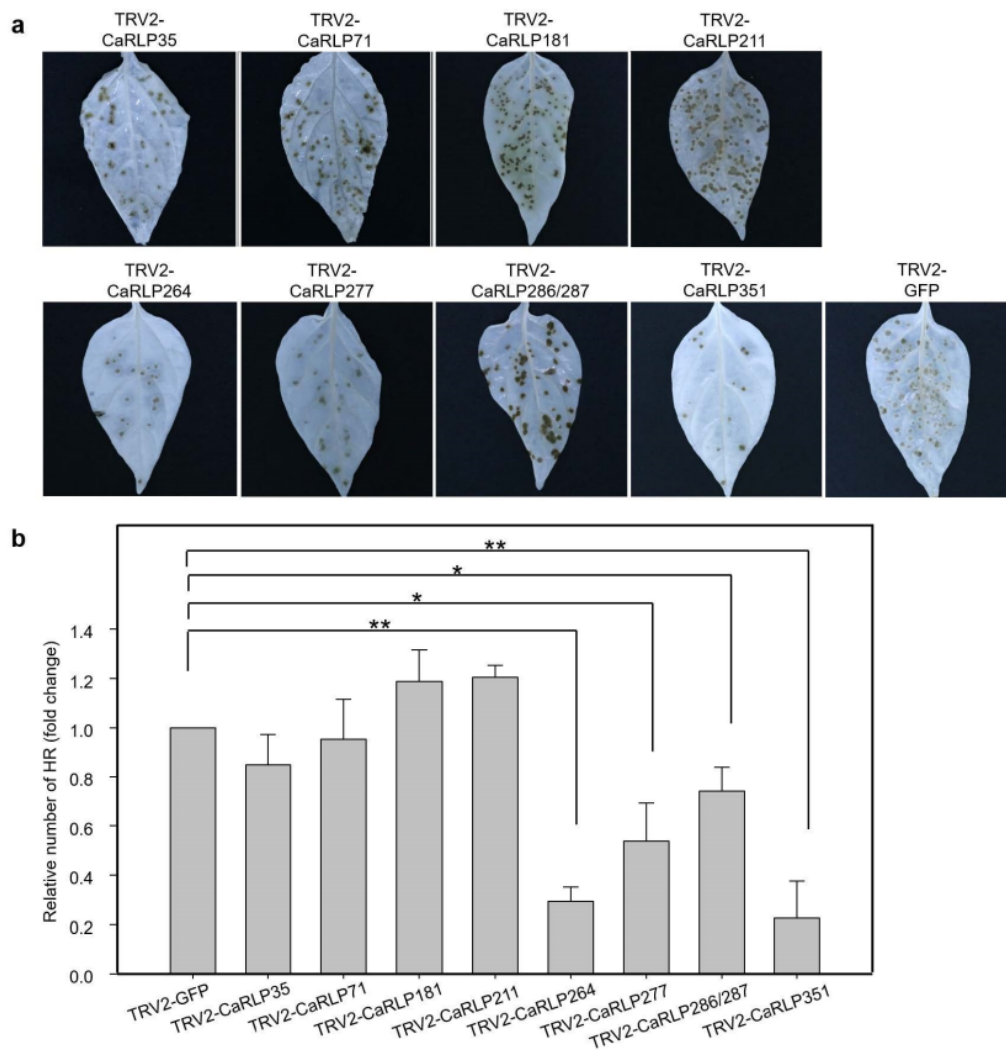

323

324 **Fig. 5. Assessment of HR lesions in CaRLPs-silenced peppers to TMV-P0 infection.** (a)  
 325 Photographs showing TMV-P0-inoculated leaves of *CaRLP*-silenced plants. Photos were taken at 3  
 326 dpi. Chlorophyll was removed using ethyl alcohol. (b) Reduced HR lesion numbers in *CaRLP*-silenced  
 327 plants inoculated with TMV-P0. Data indicate mean  $\pm$  standard error (SE) of three independent  
 328 experiments ( $n = 24$ ). Asterisks indicate statistically significant differences compared with the  
 329 *TRV2:GFP* control (\* $p < 0.05$ , \*\* $p < 0.01$ ; Student's *t*-test).

330

### 331 **Enhanced defense responses of core *CaRLP*-silenced pepper plants to various** 332 **pathogens**

333 To determine whether the core *CaRLPs* are involved in broad-spectrum resistance  
 334 to various pathogens, we tested the response of *CaRLP*-silenced and *TRV2-GFP* control  
 335 plants to *Xanthomonas axonopodis* pv. *glycines* 8ra (*Xag8ra*), *Ralstonia solanacearum*  
 336 (*Rsol*) and *P. capsici*. We examined three different responses of *CaRLP*-silenced to the

337 above mentioned pathogens; for instance, non-host resistance to Xag8ra, host resistance to  
 338 Rsol and susceptible response to *P. capsici*. We selected three *CaRLPs* (*CaRLP264*, 277  
 339 and 351), which showed the most significant difference in the resistance response to TMV-  
 340 P0 infection (Fig. 5).

341 To investigate the role of *CaRLPs* during HR response of non-host resistance<sup>53,54</sup>,  
 342 control plants (*TRV2-GFP*) and *CaRLP*-silenced plants (*TRV2-CaRLP264*, *-CaRLP277* and -  
 343 *CaRLP351*) were infiltrated with Xag8ra ( $10^8$  cfu/ml) (Fig. 6a). Xag8ra-inoculated plants of  
 344 each *CaRLP*-silenced line showed significantly reduced HR-like cell death compared with  
 345 control plants at 48 hpi. In addition, quantification of ion leakage from the inoculation-induced  
 346 lesion showed that conductivity of each *CaRLP*-silenced line was approximately 1.5–2-fold  
 347 lower than that of control plants (Fig. 6b). This suggests that the core *CaRLPs* play a crucial  
 348 role in HR-based immunity of pepper plants against Xag8ra.

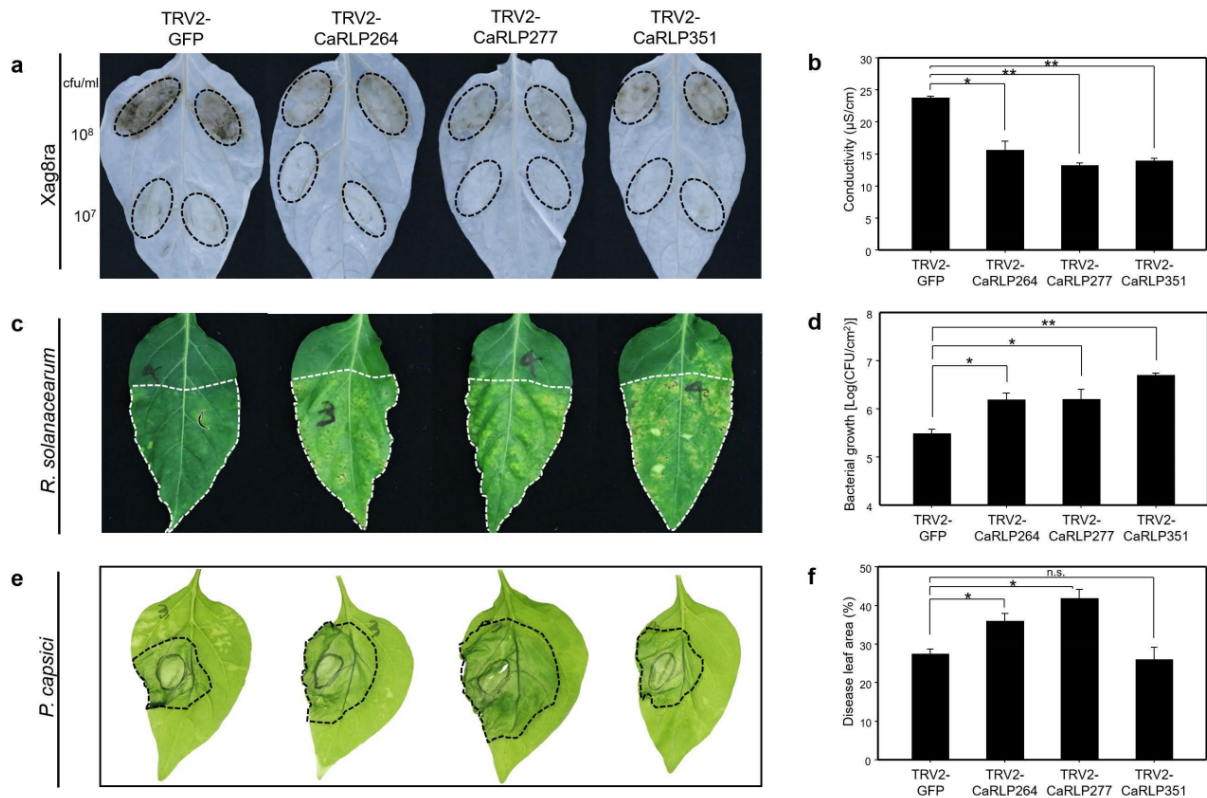

349

350 **Fig. 6. Broad-spectrum resistance of core *CaRLP*-silenced peppers against various pathogens.**  
 351 (a) Response to Xag8ra inoculation on leaves of *CaRLP*-silenced plants. Photos were taken at 2 dpi.  
 352 Chlorophyll was removed using ethyl alcohol. (b) Ion leakage data of Xag8ra-inoculated leaves. Ion  
 353 leakage was measured using leaf disks from inoculation lesion of  $10^8$  cfu/ml of Xag8ra. (c) Response  
 354 of *R. solanacearum* inoculation on leaves of *CaRLP*-silenced plants. Photos were taken at 8 dpi. (d)  
 355 Bacterial growth of *R. solanacearum* in silenced plants. (e) Disease symptoms caused by *P. capsici*  
 356 inoculation of the leaves of *CaRLP*-silenced plants and control plants. Photos were taken at 3 dpi. (f)

357 Disease lesion width normalized relative to the total leaf area. All data indicate mean  $\pm$  SE from three  
358 independent experiments. Asterisks indicate statistically significant differences compared with the  
359 *TRV2:GFP* control (\* $p < 0.05$ , \*\* $p < 0.01$ ; Student's *t*-test). n.s., not significant ( $p > 0.05$ ).

360

361 Next, we performed leaf infiltration of *Rsol*, the causal agent of bacterial wilt disease,  
362 into *CaRLP*-silenced plants of *C. annuum* cultivar 'MC4,' which is resistant to *Rsol*<sup>55</sup>. Three  
363 *CaRLP*-silenced plants rapidly developed leaf wilting symptoms including necrosis and  
364 yellowing, as observed in susceptible plants but not in control plants (Fig. 6c). Furthermore,  
365 the growth of *Rsol* was increased significantly by approximately 5–15-fold in *CaRLP*-silenced  
366 plants compared with that in control plants at 5 dpi (Fig. 6d). These findings suggest that  
367 silencing *CaRLP264*, *CaRLP277*, and *CaRLP351* enhances the susceptibility to *Rsol*.

368 Finally, the leaves of *CaRLP*-silenced and control plants were also challenged with *P.*  
369 *capsici*, and disease development was examined at 3 dpi. The *CaRLP264*- and *CaRLP277*-  
370 silenced plants showed larger disease lesions than control plants, whereas *CaRLP351*-  
371 silenced plants showed no significant difference in lesion size compared with the control (Fig.  
372 6e and 6f). This suggests that *CaRLP263* and *CaRLP277* are involved in the defense  
373 response to *P. capsici*. Taken together, plants of each *CaRLP*-silenced line consistently  
374 showed significant suppression of broad-spectrum defense against plant pathogens  
375 including viruses, bacteria, and oomycetes. Overall, our data suggest that core *CaRLPs* of  
376 the universal GCN perform conserved functions and confer resistance against multiple biotic  
377 stresses. Thus, these *CaRLPs* could be used to engineer cultivars with broad-spectrum  
378 resistance against diverse pathogens.

379

380

## 381 **DISCUSSION**

382 Plants sense pathogens via both cell surface and intracellular receptors. RLPs  
383 represent the primary layer of defense against pathogen infection in the innate immune  
384 system. In the present study, we identified a large number of *CaRLP* genes in the pepper  
385 genome, and selected variable biotic stress-responsive *CaRLP* genes as components of  
386 GCNs using 102 RNA-seq datasets. We demonstrated that three hub *CaRLPs* in the  
387 universal GCN confer broad-spectrum resistance against diverse pathogens.

388 A large percentage of genes in eukaryotic genomes are organized in clusters of  
389 various sizes and gene densities. Clusters containing resistance gene analogs (RGAs)  
390 including NLR, RLKs and RLPs have been reported in plants<sup>24,44,56</sup>. In tomato and pepper,



391 several genes related to RGAs are localized in clusters on various chromosomes<sup>56-58</sup>.  
392 Consistent with this data, we observed that *CaRLPs* belonging to the same phylogenetic  
393 group were mostly located in the same cluster, and thus showed uneven chromosomal  
394 distribution (Fig. 1). Information on the chromosomal location of *CaRLPs* would be highly  
395 valuable for the identification of functional RGAs.

396 GCNs could provide important clues for the characterization of novel genes, based  
397 on the analysis of potentially functionally associated co-expressed genes, using large-scale  
398 gene expression datasets<sup>28</sup>. Here, we attempted to infer the function of *CaRLPs* under  
399 various biotic stresses by the analysis of GCNs derived from a large number of RNA-seq  
400 datasets of *C. annuum* ‘CM334.’ GCNs were constructed using *CaRLPs* as hub genes in two  
401 steps: construction of large CaRLP-GCNs, based on the RNA-seq of each biotic stress, and  
402 construction of the intersection of CaRLP-GCNs, according to the type of biotic stress. Four  
403 large CaRLP-GCNs were constructed, each corresponding to four biotic stresses and  
404 containing 1,073–10,878 genes. These CaRLP-GCNs showed that *CaRLPs* are co-  
405 expressed with numerous other pepper genes under various biotic stresses. This result is  
406 consistent with previous studies, which showed that plant response to pathogens is  
407 extensively regulated at the transcriptional level<sup>59-61</sup>.

408 The intersection of these four GCNs led to the construction of RN (Fig. 3 and Fig. 4).  
409 The RNA-seq data in this study was obtained from *C. annuum* cultivar ‘CM334,’ which is  
410 resistant to TMV-P0, PepMoV, and *P. capsici* but susceptible to TMV-P2. Consequently, GO  
411 enrichment analysis of genes in the RN revealed the enrichment of various stress related  
412 terms such as “oxidation-reduction process,” “defense response to fungus,” “response to  
413 biotic stimulus,” and “cellular response to oxidative stress” (Fig. 4). In addition, numerous  
414 genes were enriched not only in stress related GO terms but also in transcription regulation  
415 (Fig. 4). Most of genes in the RN enriched under “regulation of transcription” encoded  
416 transcription factors, such as WRKY, AP2/ERF domain-containing proteins. These  
417 transcription factors play critical roles in abiotic and biotic stresses<sup>62</sup>. For example, WRKY  
418 proteins are involved in RLP-mediated defense response. Signal transduction of AtRLP51  
419 was mediated by BDA1, an Ankyrin-repeat-containing protein with four transmembrane  
420 domains, to provoke plant defense response through the activation of WRKY70<sup>63,64</sup>. Taken  
421 together, these data suggest that *CaRLPs* in universal GCNs could be co-regulated with  
422 transcription factors under biotic stress.

423 We hypothesized that core *CaRLPs* in the universal GCN (RN) are involved in the  
424 response to biotic stresses. To test our hypothesis, we characterized the function of core  
425 *CaRLPs* using VIGS. We were not able to develop stable transgenic plants in pepper

426 because of the limitation of transgenic system for pepper and the low regeneration rate of  
427 pepper plants under in vitro conditions<sup>65</sup>. Of the six *CaRLPs* tested in this study, plants  
428 silenced for the expression of three *CaRLPs* showed reduced HR-like cell death upon TMV-  
429 P0 and Xag8ra inoculation (Fig. 5 and Fig. 6). By contrast, the silencing of each *CaRLP*  
430 significantly enhanced the disease susceptibility of pepper plants to *Rsol* and *P. capsici*  
431 compared with control plants (Fig. 6). These data suggest that the core *CaRLPs* in the  
432 universal GCN perform conserved functions and induce broad-spectrum resistance against  
433 plant pathogens. Thus, construction of a universal GCN from comprehensive transcriptome  
434 datasets could provide useful clues for uncovering the roles of genes in various biological  
435 processes.

436 Resistance gene-mediated immunity is highly effective immune systems against  
437 specific pathogens. On the other hands, PRRs, located on the plant cell surface, could  
438 confer resistance to a broad range of pathogens. In previous studies, few plant PRRs  
439 showed broad-spectrum resistance to pathogens. Expression of the Arabidopsis elongation  
440 factor Tu (EF-Tu), one of the PRRs, in *N. benthamiana* and tomato increased resistance to  
441 *Pseudomonas*, *Agrobacterium*, *Xanthomonas* and *Ralstonia*<sup>4</sup>. In potato, the elicitor response  
442 (ELR) receptor-like protein associates with the immune co-receptor BAK/SERK3, and  
443 mediates broad-spectrum recognition of elicitor proteins from several *Phytophthora* species<sup>5</sup>.  
444 In addition, suppression of the pepper lectin receptor kinase gene *CaLecRK-S.5*, which acts  
445 as a PRR, showed enhanced susceptibility to PepMoV, *Xanthomonas*, and, *P. capsici*<sup>66</sup>. In  
446 this study, through generation of a conserved GCN, we identified PRRs involved in broad-  
447 spectrum resistance against diverse plant pathogens. Three *CaRLPs* (*CaRLP264*, 277 and  
448 351) enhanced susceptibility to TMV-P0, *Xanthomonas*, *Ralstonia*, and *P. capsici* (Fig. 5 and  
449 Fig. 6). Thus, these *CaRLPs* could potentially be used to develop Solanaceae crop cultivars  
450 with broad-spectrum resistance against diverse pathogens. Overall, a universal GCN with  
451 comprehensive RNA-seq datasets could provide key insights to unveil gene functions in  
452 biological processes.

453

454

## 455 **MATERIALS AND METHODS**

### 456 **Identification of *CaRLP* genes**

457 A total of 13 characterized plant *RLP* genes (Supplementary Table S8) were used to  
458 obtain *CaRLP* gene sequences, which were used to build an hidden Markov model (HMM)  
459 domain with the HMMER software package (version 3.0; <http://hmmer.org/>), and identified

460 putative RLP-encoding genes against the *C. annuum* ‘CM334’ v. 1.55 genome. Then,  
461 tBLASTn searches were performed using the HMMER domain from amino acid sequences  
462 encoded by the pepper genome (threshold:  $10^{-4}$ ). Consequently, 600–750 hits to genes in  
463 the pepper genome were obtained from the BLAST output, accounting for 7,376 genes in  
464 total. This gene set was processed to remove redundant sequences by manual curation,  
465 thus obtaining 784 non-redundant candidate genes. The structure of CaRLPs was annotated  
466 using Pfam<sup>67</sup> and SMART<sup>68</sup> databases, and genes with kinase and NB-ARC domains were  
467 filtered out using Pfam IDs PF07714.12, PF00069.20 and PF00931, respectively. Finally,  
468 438 CaRLPs from the ‘CM334’ genome.

469

### 470 **Phylogenetic analysis and classification of CaRLPs**

471 The CaRLPs were classified based on the results of phylogenetic analysis and  
472 sequence similarity-based clustering, as described previously<sup>24,44</sup>. Clustering analysis of full-  
473 length amino acid sequences of Arabidopsis, tomato, pepper and reported RLPs was  
474 performed by OrthoMCL<sup>69</sup>. RLPs within the same cluster were determined to be identical  
475 subgroups to the phylogenetic subgroups. RLPs clustered as singletons (mostly partial and  
476 short sequences) were identified using a BLASTP search against identified RLPs, and  
477 subgroups were assigned. We designated the known RLP names according to the  
478 corresponding pepper RLP groups.

479 A conserved domain of an HMM profile was built based on the amino acid sequence  
480 of conserved C3-D region<sup>25</sup> of known RLPs. A phylogenetic tree was constructed based on  
481 the C3-D domain of 56 AtRLPs<sup>22,25</sup>, 176 SIRLPs<sup>24</sup>, 438 CaRLPs, and 13 RLPs reported by  
482 HMM search (E-value < 0.001). *RLP* genes containing less than 80% of the full-length C3-D  
483 domain sequence were excluded. Multiple sequence alignment of the C3-D domains of  
484 RLPs was performed using MUSCLE (<http://www.ebi.ac.uk/Tools/msa/muscle/>). The  
485 alignment result was used to build a phylogenetic tree using PhyML  
486 (<http://www.phylogeny.fr/>), with default parameters (SH-like approximate likelihood-ratio test  
487 for branch support), and the resulting phylogenetic trees were edited using the MEGA8  
488 software (<http://www.megasoftware.net/>).

### 489 **Chromosomal location, physical cluster, and motif analyses**

490 The chromosomal location of *CaRLPs* was determined based on the genome  
491 sequence of the pepper cultivar ‘CM334’<sup>42</sup>. MapChart<sup>70</sup> was used to draw the location of  
492 RLPs on chromosomes. Physical clustering of *CaRLPs* in the pepper genome was  
493 determined based on two criteria: 1) the gene cluster spans a region of 200 kb or less; and 2)

494 the cluster contains less than eight non-*RLP* genes between two *CaRLPs*<sup>24,44</sup>.

495 Conserved motifs in *CaRLPs* were identified using the MEME suite ([http://meme-](http://meme-suite.org/tools/meme)  
496 [suite.org/tools/meme](http://meme-suite.org/tools/meme)), with default settings except for the following parameters: maximum  
497 number of motifs, 20; minimum width of motifs, 15; maximum width of motifs, 200.  
498 Subsequently, MAST (<http://meme-suite.org/tools/mast>) was carried out on datasets  
499 including protein sequences of *CaRLPs* and known *RLPs* with default E-values.

500

### 501 **RNA-seq library construction**

502 Changes in the expression profiles of *CaRLPs* upon *P. capsici* infection were  
503 investigated in the pepper cultivar 'CM334' by RNA-seq analysis. Leaves of 4–5-week-old  
504 pepper plants were infiltrated with *P. capsici* ( $5 \times 10^4$  zoospore/ml), and infected leaves were  
505 collected at 0, 1, 2, 4, 6, 12, and 24 hpi in three biological replicates. Total RNA was isolated  
506 using the TRIzol Reagent (Invitrogen, Carlsbad, CA, USA), according to the manufacturer's  
507 instructions. RNA-seq libraries were constructed as described previously<sup>45</sup>. All 39 RNA-seq  
508 libraries (21 libraries of *P. capsici*-infected samples, and 18 libraries of control samples) were  
509 sequenced using Illumina HiSeq 2000 (Illumina Inc., San Diego, CA, USA).

510

### 511 **RNA-seq data analysis**

512 Quality control of RNA-seq data of *P. capsici*-infected samples was performed by  
513 removing low-quality reads and possible contaminants, as described previously<sup>40,41</sup>. Adapter  
514 and low-quality sequences were filtered using Cutadapt<sup>71</sup> and Trimmomatic<sup>72</sup>, based on the  
515 Phred quality threshold of 20. In addition, transcriptome data of pepper plants infected by  
516 TMV-P0, TMV-P2, and PepMoV were obtained from previous studies<sup>43,45</sup> to analyze the  
517 expression of *CaRLPs*.

518

### 519 **Gene expression analysis**

520 The expression profiles of *CaRLPs* under biotic stresses were analyzed using RNA-  
521 seq data of TMV-P0-, TMV-P2- and PepMoV-inoculated pepper plants and that of *P. capsici*-  
522 inoculated pepper plants. Sequence reads from all RNA-seq datasets were aligned to the  
523 'CM334' reference genome using Hisat2<sup>73</sup>. Filtered clean reads of virus RNA-seq and *P.*  
524 *capsici* RNA-seq were normalized into reads per kilobase per million mapped reads and  
525 fragments per kilobase per million mapped fragments, respectively. DEGs were identified

526 using the DESeq2 package (FDR < 0.05)<sup>74</sup>. The expression patterns of DEGs were  
527 visualized using ComplexHeatmap<sup>75</sup>.

528

### 529 **GCN construction and GO and KEGG enrichment analyses**

530 The GCN was constructed from 102 RNA-seq datasets using the exp2net function  
531 of the miDNA package<sup>76</sup>, and inferred using the Pearson's product moment correlation  
532 coefficient at a significance level of  $P < 0.01$ . In next step, genes co-expressed with *CaRLPs*  
533 were identified by filtering the correlation coefficient ( $|r| > 0.8$ ) and only directed interaction.  
534 The GCN was visualized using Cytoscape v3.4.0<sup>77</sup>. To identify gene networks involved in  
535 different stress responses, GCNs containing *CaRLP* genes were extracted by different  
536 combinations of all stresses using Merge Tools in Cytoscpae. GO and KEGG enrichment  
537 analyses were performed by Goseq<sup>78</sup> in R packages using Pepper v1.55 genome  
538 annotation from BLAST2GO<sup>79</sup>.

539

### 540 **VIGS**

541 Pepper cultivars *C. annuum* 'Nockwang' and 'MC4' were used to analyze the effect  
542 of *CaRLP* gene silencing on defense response. Seedlings with two fully expanded  
543 cotyledons were for the VIGS assay. The 3' or 5' untranslated region (UTR) of eight *CaRLP*  
544 genes (*CaRLP35*, *CaRLP71*, *CaRLP181*, *CaRLP211*, *CaRLP264*, *CaRLP277*,  
545 *CaRLP286/287* and *CaRLP351*) was amplified and cloned into the pTRV2 vector. The  
546 resulting pTRV2-*CaRLP* constructs were transformed into *Agrobacterium tumefaciens* strain  
547 GV3101. VIGS was conducted as described previously<sup>80</sup>. Plants infiltrated with *pTRV2-GFP*  
548 or *pTRV2-PDS* with pTRV1 were used as a control. One leaf was harvested from each  
549 *CaRLP*-silenced plant for RNA extraction and the measurement of silencing efficiency.

550

### 551 **Pathogen inoculation**

552 All pathogen inoculations were performed on the 3<sup>rd</sup> and 4<sup>th</sup> true leaves of *CaRLP*-  
553 silenced and control pepper plants at 4–5 weeks after the VIGS assay. Plants were  
554 challenged with three different types of pathogens (including viruses (TMV-P0, Xag8ra),  
555 bacteria (*Rsol*) and oomycete (*P. capsici*). The TMV-P0 inoculum was prepared from 1 g of  
556 infected *N. benthamiana* leaves using 10 ml of 0.1 M phosphate buffer (pH 7.0). TMV-  
557 inoculated leaves were monitored and harvested at 3 days post-inoculation (dpi). To assess  
558 the formation of lesions on TMV-inoculated leaves, chlorophyll was removed using ethyl

559 alcohol. To conduct the Rsol-response assay, Rsol 'SL1931' was cultured first in TZC agar  
560 medium at 28°C for 2 days and then in CPG medium at 28°C for 24 h, and then suspended  
561 in distilled sterile water. The Rsol suspension was diluted to a concentration of 10<sup>5</sup> cfu/ml,  
562 and infiltrated into the leaves of *CaRLP*-silenced pepper plants. Subsequently, Rsol-  
563 inoculated plants were grown in a growth chamber at 28 ± 2°C, 70% relative humidity and  
564 16h-light/8h-dark photoperiod, and inoculated leaves were harvested at 5 dpi. Inocula of  
565 *Xag8ra* and *P. capsici* were prepared as described previously<sup>53,80</sup>. The *Xag8ra* culture was  
566 suspended in 10 mM MgCl<sub>2</sub>, and then diluted to 10<sup>7</sup> and 10<sup>8</sup> cfu/ml concentrations. The  
567 *Xag8ra*-inoculated leaves were harvested at 2 dpi and used for measuring conductivity and  
568 detecting cell death. To prepare the *P. capsici* inoculum, the released zoospores were  
569 collected and diluted in distilled sterile water to a concentration of 1 × 10<sup>5</sup> spores/ml. The *P.*  
570 *capsici* suspension was infiltrated into the leaves of *CaRLP*-silenced pepper plants, and  
571 harvested at 3 dpi. All pathogen inoculation were conducted in at least three independent  
572 experiments, with 8–12 plants for per experiment.

573

#### 574 **Quantification of ion leakage**

575 Ion leakage from *Xag8ra*-inoculated leaves was measured as described previously<sup>53</sup>.  
576 Sixteen leaf disks (each 1 cm in diameter) were excised from 4–6 plants of each *CaRLP*-  
577 silenced line, and floated on 15 ml of sterile distilled water for 2 h at room temperature. Then,  
578 the electrolyte leakage from leaf discs was measured by a conductivity meter (Eutech con  
579 510; Thermo scientific, Waltham, MA, USA).

580

#### 581 **Bacterial cell counting**

582 In Rsol-inoculated pepper plants, bacterial cell growth was measured in planta, as  
583 described previously<sup>55</sup>, with slight modifications. Six leaf disks (each 1 cm in diameter) were  
584 excised from Rsol-inoculated leaves of 3–4 plants of each *CaRLP*-silenced line at 5dpi. Leaf  
585 disks were ground in sterile distilled water, and serial dilutions were plated on CPG agar  
586 medium supplemented with gentamycin. The plates were incubated at 28°C, and bacterial  
587 cells were counted after 2 days.

588

#### 589 **ACKNOWLEDGEMENTS**

590 This research was supported by the National Research Foundation of Korea (NRF) funded  
591 by the Korean Government (NRF-2017R1E1A1A01072843 and 2019R1C1C1007472). We

592 appreciate the support from the KRIBB initiative program.

593

594 **CONFLICT OF INTERESTS**

595 The authors have declared that no competing interests exist.

596

597 **AUTHOR CONTRIBUTIONS**

598 WHK, BP, and JSK collected samples and performed experiments. YMK and JL generated

599 RNA-seq data. NK and WHK analyzed transcriptome. WHK and SIY conceived and

600 designed the experiments, organized and wrote the manuscript, and supervised the project.

601 All authors read and approved the final manuscript.

602

603 **References**

604

- 605 1 Lee, H. A. & Yeom, S. I. Plant NB-LRR proteins: tightly regulated sensors in a complex  
606 manner. *Brief Funct Genomics* **14**, 233-242, doi:10.1093/bfpg/elv012 (2015).
- 607 2 Wan, W. L., Frohlich, K., Pruitt, R. N., Nurnberger, T. & Zhang, L. Plant cell surface immune  
608 receptor complex signaling. *Curr Opin Plant Biol* **50**, 18-28, doi:10.1016/j.pbi.2019.02.001  
609 (2019).
- 610 3 Albert, I., Hua, C., Nurnberger, T., Pruitt, R. N. & Zhang, L. Surface Sensor Systems in Plant  
611 Immunity. *Plant Physiol* **182**, 1582-1596, doi:10.1104/pp.19.01299 (2020).
- 612 4 Lacombe, S. *et al.* Interfamily transfer of a plant pattern-recognition receptor confers broad-  
613 spectrum bacterial resistance. *Nat Biotechnol* **28**, 365-369, doi:10.1038/nbt.1613 (2010).
- 614 5 Du, J. *et al.* Elicitin recognition confers enhanced resistance to *Phytophthora infestans* in  
615 potato. *Nat Plants* **1**, 15034, doi:10.1038/nplants.2015.34 (2015).
- 616 6 Dixon, M. S., Hatzixanthis, K., Jones, D. A., Harrison, K. & Jones, J. D. The tomato Cf-5  
617 disease resistance gene and six homologs show pronounced allelic variation in leucine-rich  
618 repeat copy number. *Plant Cell* **10**, 1915-1925, doi:10.1105/tpc.10.11.1915 (1998).
- 619 7 Dixon, M. S. *et al.* The tomato Cf-2 disease resistance locus comprises two functional genes  
620 encoding leucine-rich repeat proteins. *Cell* **84**, 451-459, doi:10.1016/s0092-8674(00)81290-8  
621 (1996).
- 622 8 Takken, F. L., Schipper, D., Nijkamp, H. J. & Hille, J. Identification and Ds-tagged isolation of a  
623 new gene at the Cf-4 locus of tomato involved in disease resistance to *Cladosporium fulvum*  
624 race 5. *Plant J* **14**, 401-411, doi:10.1046/j.1365-313x.1998.00135.x (1998).
- 625 9 Thomas, C. M. *et al.* Characterization of the tomato Cf-4 gene for resistance to *Cladosporium*  
626 *fulvum* identifies sequences that determine recognitional specificity in Cf-4 and Cf-9. *Plant*  
627 *Cell* **9**, 2209-2224, doi:10.1105/tpc.9.12.2209 (1997).
- 628 10 Hegenauer, V. *et al.* Detection of the plant parasite *Cuscuta reflexa* by a tomato cell surface  
629 receptor. *Science* **353**, 478-481, doi:10.1126/science.aaf3919 (2016).
- 630 11 Jehle, A. K. *et al.* The receptor-like protein ReMAX of *Arabidopsis* detects the microbe-  
631 associated molecular pattern eMax from *Xanthomonas*. *Plant Cell* **25**, 2330-2340,  
632 doi:10.1105/tpc.113.110833 (2013).
- 633 12 Kawchuk, L. M. *et al.* Tomato Ve disease resistance genes encode cell surface-like receptors.  
634 *Proc Natl Acad Sci U S A* **98**, 6511-6515, doi:10.1073/pnas.091114198 (2001).
- 635 13 Larkan, N. J. *et al.* The Brassica napus blackleg resistance gene LepR3 encodes a receptor-  
636 like protein triggered by the *Leptosphaeria maculans* effector AVR1M1. *New Phytol* **197**, 595-  
637 605, doi:10.1111/nph.12043 (2013).
- 638 14 Ron, M. & Avni, A. The receptor for the fungal elicitor ethylene-inducing xylanase is a member  
639 of a resistance-like gene family in tomato. *Plant Cell* **16**, 1604-1615, doi:10.1105/tpc.022475  
640 (2004).
- 641 15 Shen, Y. & Diener, A. C. *Arabidopsis thaliana* resistance to *fusarium oxysporum* 2 implicates



- 642 tyrosine-sulfated peptide signaling in susceptibility and resistance to root infection. *PLoS*  
643 *Genet* **9**, e1003525, doi:10.1371/journal.pgen.1003525 (2013).
- 644 16 Steinbrenner, A. D. *et al.* A receptor-like protein mediates plant immune responses to  
645 herbivore-associated molecular patterns. *Proc Natl Acad Sci U S A* **117**, 31510-31518,  
646 doi:10.1073/pnas.2018415117 (2020).
- 647 17 Vinatzer, B. A. *et al.* Apple contains receptor-like genes homologous to the *Cladosporium*  
648 *fulvum* resistance gene family of tomato with a cluster of genes cosegregating with Vf apple  
649 scab resistance. *Mol Plant Microbe Interact* **14**, 508-515, doi:10.1094/MPMI.2001.14.4.508  
650 (2001).
- 651 18 Zhang, B. *et al.* BrRLP48, Encoding a Receptor-Like Protein, Involved in Downy Mildew  
652 Resistance in Brassica rapa. *Front Plant Sci* **9**, 1708, doi:10.3389/fpls.2018.01708 (2018).
- 653 19 Jeong, S., Trotochaud, A. E. & Clark, S. E. The Arabidopsis CLAVATA2 gene encodes a  
654 receptor-like protein required for the stability of the CLAVATA1 receptor-like kinase. *Plant Cell*  
655 **11**, 1925-1934, doi:10.1105/tpc.11.10.1925 (1999).
- 656 20 Nadeau, J. A. & Sack, F. D. Control of stomatal distribution on the Arabidopsis leaf surface.  
657 *Science* **296**, 1697-1700, doi:10.1126/science.1069596 (2002).
- 658 21 Taguchi-Shiobara, F., Yuan, Z., Hake, S. & Jackson, D. The fasciated ear2 gene encodes a  
659 leucine-rich repeat receptor-like protein that regulates shoot meristem proliferation in maize.  
660 *Genes Dev* **15**, 2755-2766, doi:10.1101/gad.208501 (2001).
- 661 22 Wang, G. *et al.* A genome-wide functional investigation into the roles of receptor-like proteins  
662 in Arabidopsis. *Plant Physiol* **147**, 503-517, doi:10.1104/pp.108.119487 (2008).
- 663 23 Petre, B., Hacquard, S., Duplessis, S. & Rouhier, N. Genome analysis of poplar LRR-RLP  
664 gene clusters reveals RISP, a defense-related gene coding a candidate endogenous peptide  
665 elicitor. *Front Plant Sci* **5**, 111, doi:10.3389/fpls.2014.00111 (2014).
- 666 24 Kang, W. H. & Yeom, S. I. Genome-wide Identification, Classification, and Expression  
667 Analysis of the Receptor-Like Protein Family in Tomato. *Plant Pathol J* **34**, 435-444,  
668 doi:10.5423/PPJ.OA.02.2018.0032 (2018).
- 669 25 Fritz-Laylin, L. K., Krishnamurthy, N., Tor, M., Sjolander, K. V. & Jones, J. D. Phylogenomic  
670 analysis of the receptor-like proteins of rice and Arabidopsis. *Plant Physiol* **138**, 611-623,  
671 doi:10.1104/pp.104.054452 (2005).
- 672 26 Yang, H., Bayer, P. E., Tirnaz, S., Edwards, D. & Batley, J. Genome-Wide Identification and  
673 Evolution of Receptor-Like Kinases (RLKs) and Receptor like Proteins (RLPs) in Brassica  
674 juncea. *Biology (Basel)* **10**, doi:10.3390/biology10010017 (2020).
- 675 27 Restrepo-Montoya, D., Brueggeman, R., McClean, P. E. & Osorno, J. M. Computational  
676 identification of receptor-like kinases "RLK" and receptor-like proteins "RLP" in legumes. *BMC*  
677 *Genomics* **21**, 459, doi:10.1186/s12864-020-06844-z (2020).
- 678 28 Li, Y., Pearl, S. A. & Jackson, S. A. Gene Networks in Plant Biology: Approaches in  
679 Reconstruction and Analysis. *Trends Plant Sci* **20**, 664-675, doi:10.1016/j.tplants.2015.06.013  
680 (2015).
- 681 29 Sun, B. M. *et al.* Coexpression network analysis reveals an MYB transcriptional activator

- 682 involved in capsaicinoid biosynthesis in hot peppers. *Hortic Res-England* **7**, doi:ARTN 162  
683 10.1038/s41438-020-00381-2 (2020).
- 684 30 Zheng, J. *et al.* Co-expression analysis aids in the identification of genes in the cuticular wax  
685 pathway in maize. *Plant Journal* **97**, 530-542, doi:10.1111/tpj.14140 (2019).
- 686 31 Ruprecht, C., Vaid, N., Proost, S., Persson, S. & Mutwil, M. Beyond Genomics: Studying  
687 Evolution with Gene Coexpression Networks. *Trends Plant Sci* **22**, 298-307,  
688 doi:10.1016/j.tplants.2016.12.011 (2017).
- 689 32 Amrine, K. C., Blanco-Ulate, B. & Cantu, D. Discovery of core biotic stress responsive genes  
690 in Arabidopsis by weighted gene co-expression network analysis. *PLoS One* **10**, e0118731,  
691 doi:10.1371/journal.pone.0118731 (2015).
- 692 33 Dossa, K. *et al.* Depicting the Core Transcriptome Modulating Multiple Abiotic Stresses  
693 Responses in Sesame (*Sesamum indicum* L.). *Int J Mol Sci* **20**, doi:10.3390/ijms20163930  
694 (2019).
- 695 34 Zhu, M. *et al.* WGCNA Analysis of Salt-Responsive Core Transcriptome Identifies Novel Hub  
696 Genes in Rice. *Genes (Basel)* **10**, doi:10.3390/genes10090719 (2019).
- 697 35 Ruprecht, C. *et al.* FamNet: A Framework to Identify Multiplied Modules Driving Pathway  
698 Expansion in Plants. *Plant Physiol* **170**, 1878-1894, doi:10.1104/pp.15.01281 (2016).
- 699 36 Ichihashi, Y. *et al.* Evolutionary developmental transcriptomics reveals a gene network module  
700 regulating interspecific diversity in plant leaf shape. *Proc Natl Acad Sci U S A* **111**, E2616-  
701 2621, doi:10.1073/pnas.1402835111 (2014).
- 702 37 Chang, Y. M. *et al.* Comparative transcriptomics method to infer gene coexpression networks  
703 and its applications to maize and rice leaf transcriptomes. *Proc Natl Acad Sci U S A* **116**,  
704 3091-3099, doi:10.1073/pnas.1817621116 (2019).
- 705 38 Gerstein, M. B. *et al.* Comparative analysis of the transcriptome across distant species.  
706 *Nature* **512**, 445-448, doi:10.1038/nature13424 (2014).
- 707 39 Mutwil, M. *et al.* PlaNet: combined sequence and expression comparisons across plant  
708 networks derived from seven species. *Plant Cell* **23**, 895-910, doi:10.1105/tpc.111.083667  
709 (2011).
- 710 40 Kang, W. H. *et al.* Transcriptome profiling of abiotic responses to heat, cold, salt, and osmotic  
711 stress of *Capsicum annuum* L. *Sci Data* **7**, 17, doi:10.1038/s41597-020-0352-7 (2020).
- 712 41 Lee, J. *et al.* Comprehensive transcriptome resource for response to phytohormone-induced  
713 signaling in *Capsicum annuum* L. *BMC Res Notes* **13**, 440, doi:10.1186/s13104-020-05281-1  
714 (2020).
- 715 42 Kim, S. *et al.* New reference genome sequences of hot pepper reveal the massive evolution  
716 of plant disease-resistance genes by retroduplication. *Genome Biol* **18**, 210,  
717 doi:10.1186/s13059-017-1341-9 (2017).
- 718 43 Kim, M. S. *et al.* Global gene expression profiling for fruit organs and pathogen infections in  
719 the pepper, *Capsicum annuum* L. *Sci Data* **5**, 180103, doi:10.1038/sdata.2018.103 (2018).
- 720 44 Seo, E., Kim, S., Yeom, S. I. & Choi, D. Genome-Wide Comparative Analyses Reveal the  
721 Dynamic Evolution of Nucleotide-Binding Leucine-Rich Repeat Gene Family among

- 722 Solanaceae Plants. *Front Plant Sci* **7**, 1205, doi:10.3389/fpls.2016.01205 (2016).
- 723 45 Kang, W. H., Kim, S., Lee, H. A., Choi, D. & Yeom, S. I. Genome-wide analysis of Dof  
724 transcription factors reveals functional characteristics during development and response to  
725 biotic stresses in pepper. *Sci Rep* **6**, 33332, doi:10.1038/srep33332 (2016).
- 726 46 Kim, N., Kang, W. H., Lee, J. & Yeom, S. I. Development of Clustered Resistance Gene  
727 Analogs-Based Markers of Resistance to *Phytophthora capsici* in Chili Pepper. *Biomed Res*  
728 *Int* **2019**, 1093186, doi:10.1155/2019/1093186 (2019).
- 729 47 Frederickson Matika, D. E. & Loake, G. J. Redox regulation in plant immune function. *Antioxid*  
730 *Redox Signal* **21**, 1373-1388, doi:10.1089/ars.2013.5679 (2014).
- 731 48 Mittler, R. Oxidative stress, antioxidants and stress tolerance. *Trends Plant Sci* **7**, 405-410,  
732 doi:10.1016/s1360-1385(02)02312-9 (2002).
- 733 49 Wu, L. *et al.* Phosphoproteomic analysis of the resistant and susceptible genotypes of maize  
734 infected with sugarcane mosaic virus. *Amino Acids* **47**, 483-496, doi:10.1007/s00726-014-  
735 1880-2 (2015).
- 736 50 Kazan, K. & Gardiner, D. M. Targeting pathogen sterols: Defence and counterdefence? *PLoS*  
737 *Pathog* **13**, e1006297, doi:10.1371/journal.ppat.1006297 (2017).
- 738 51 van Loon, L. C., Geraats, B. P. & Linthorst, H. J. Ethylene as a modulator of disease  
739 resistance in plants. *Trends Plant Sci* **11**, 184-191, doi:10.1016/j.tplants.2006.02.005 (2006).
- 740 52 Erb, M. & Kliebenstein, D. J. Plant Secondary Metabolites as Defenses, Regulators, and  
741 Primary Metabolites: The Blurred Functional Trichotomy. *Plant Physiol* **184**, 39-52,  
742 doi:10.1104/pp.20.00433 (2020).
- 743 53 Yeom, S. I. *et al.* Use of a secretion trap screen in pepper following *Phytophthora capsici*  
744 infection reveals novel functions of secreted plant proteins in modulating cell death. *Mol Plant*  
745 *Microbe Interact* **24**, 671-684, doi:10.1094/MPMI-08-10-0183 (2011).
- 746 54 Yi, S. Y. *et al.* A novel pepper (*Capsicum annum*) receptor-like kinase functions as a negative  
747 regulator of plant cell death via accumulation of superoxide anions. *New Phytol* **185**, 701-715,  
748 doi:10.1111/j.1469-8137.2009.03095.x (2010).
- 749 55 Kwon, J.-S., Nam, J.-Y., Yeom, S.-I. & Kang, W.-H. Leaf-to-whole plant spread bioassay for  
750 pepper and *Ralstonia solanacearum* interaction determines inheritance of resistance to  
751 bacterial wilt for further breeding. *bioRxiv*, 2021.2001.2027.428365,  
752 doi:10.1101/2021.01.27.428365 (2021).
- 753 56 Andolfo, G. *et al.* Overview of tomato (*Solanum lycopersicum*) candidate pathogen  
754 recognition genes reveals important *Solanum* R locus dynamics. *New Phytol* **197**, 223-237,  
755 doi:10.1111/j.1469-8137.2012.04380.x (2013).
- 756 57 Kim, S. B. *et al.* Divergent evolution of multiple virus-resistance genes from a progenitor in  
757 *Capsicum* spp. *New Phytol* **213**, 886-899, doi:10.1111/nph.14177 (2017).
- 758 58 Kruijt, M., MJ, D. E. K. & de Wit, P. J. Receptor-like proteins involved in plant disease  
759 resistance. *Mol Plant Pathol* **6**, 85-97, doi:10.1111/j.1364-3703.2004.00264.x (2005).
- 760 59 Buscaill, P. & Rivas, S. Transcriptional control of plant defence responses. *Curr Opin Plant*  
761 *Biol* **20**, 35-46, doi:10.1016/j.pbi.2014.04.004 (2014).

- 762 60 Eulgem, T. Regulation of the Arabidopsis defense transcriptome. *Trends Plant Sci* **10**, 71-78,  
763 doi:10.1016/j.tplants.2004.12.006 (2005).
- 764 61 Tsuda, K. & Somssich, I. E. Transcriptional networks in plant immunity. *New Phytol* **206**, 932-  
765 947, doi:10.1111/nph.13286 (2015).
- 766 62 Javed, T. *et al.* Transcription Factors in Plant Stress Responses: Challenges and Potential for  
767 Sugarcane Improvement. *Plants (Basel)* **9**, doi:10.3390/plants9040491 (2020).
- 768 63 Yang, Y. *et al.* The ankyrin-repeat transmembrane protein BDA1 functions downstream of the  
769 receptor-like protein SNC2 to regulate plant immunity. *Plant Physiol* **159**, 1857-1865,  
770 doi:10.1104/pp.112.197152 (2012).
- 771 64 Zhang, Y. *et al.* Arabidopsis snc2-1D activates receptor-like protein-mediated immunity  
772 transduced through WRKY70. *Plant Cell* **22**, 3153-3163, doi:10.1105/tpc.110.074120 (2010).
- 773 65 Kothari, S. L., Joshi, A., Kachhwaha, S. & Ochoa-Alejo, N. Chilli peppers--a review on tissue  
774 culture and transgenesis. *Biotechnol Adv* **28**, 35-48, doi:10.1016/j.biotechadv.2009.08.005  
775 (2010).
- 776 66 Woo, J. Y., Jeong, K. J., Kim, Y. J. & Paek, K. H. CaLecRK-S.5, a pepper L-type lectin  
777 receptor kinase gene, confers broad-spectrum resistance by activating priming. *J Exp Bot* **67**,  
778 5725-5741, doi:10.1093/jxb/erw336 (2016).
- 779 67 Finn, R. D. *et al.* Pfam: the protein families database. *Nucleic Acids Res* **42**, D222-230,  
780 doi:10.1093/nar/gkt1223 (2014).
- 781 68 Schultz, J., Milpetz, F., Bork, P. & Ponting, C. P. SMART, a simple modular architecture  
782 research tool: identification of signaling domains. *Proc Natl Acad Sci U S A* **95**, 5857-5864,  
783 doi:10.1073/pnas.95.11.5857 (1998).
- 784 69 Li, L., Stoeckert, C. J., Jr. & Roos, D. S. OrthoMCL: identification of ortholog groups for  
785 eukaryotic genomes. *Genome Res* **13**, 2178-2189, doi:10.1101/gr.1224503 (2003).
- 786 70 Voorrips, R. E. MapChart: software for the graphical presentation of linkage maps and QTLs.  
787 *J Hered* **93**, 77-78, doi:10.1093/jhered/93.1.77 (2002).
- 788 71 Martin, M. Cutadapt removes adapter sequences from high-throughput sequencing reads.  
789 *EMBnet journal* **17**, doi:<https://doi.org/10.14806/ej.17.1.200> (2011).
- 790 72 Bolger, A. M., Lohse, M. & Usadel, B. Trimmomatic: a flexible trimmer for Illumina sequence  
791 data. *Bioinformatics* **30**, 2114-2120, doi:10.1093/bioinformatics/btu170 (2014).
- 792 73 Kim, D., Langmead, B. & Salzberg, S. L. HISAT: a fast spliced aligner with low memory  
793 requirements. *Nat Methods* **12**, 357-360, doi:10.1038/nmeth.3317 (2015).
- 794 74 Love, M. I., Huber, W. & Anders, S. Moderated estimation of fold change and dispersion for  
795 RNA-seq data with DESeq2. *Genome Biol* **15**, 550, doi:10.1186/s13059-014-0550-8 (2014).
- 796 75 Gu, Z., Eils, R. & Schlesner, M. Complex heatmaps reveal patterns and correlations in  
797 multidimensional genomic data. *Bioinformatics* **32**, 2847-2849,  
798 doi:10.1093/bioinformatics/btw313 (2016).
- 799 76 Ma, C., Xin, M., Feldmann, K. A. & Wang, X. Machine learning-based differential network  
800 analysis: a study of stress-responsive transcriptomes in Arabidopsis. *Plant Cell* **26**, 520-537,  
801 doi:10.1105/tpc.113.121913 (2014).

- 802 77 Shannon, P. *et al.* Cytoscape: a software environment for integrated models of biomolecular  
803 interaction networks. *Genome Res* **13**, 2498-2504, doi:10.1101/gr.1239303 (2003).
- 804 78 Young, M. D., Wakefield, M. J., Smyth, G. K. & Oshlack, A. Gene ontology analysis for RNA-  
805 seq: accounting for selection bias. *Genome Biol* **11**, R14, doi:10.1186/gb-2010-11-2-r14  
806 (2010).
- 807 79 Gotz, S. *et al.* High-throughput functional annotation and data mining with the Blast2GO suite.  
808 *Nucleic Acids Res* **36**, 3420-3435, doi:10.1093/nar/gkn176 (2008).
- 809 80 Yeom, S. I., Seo, E., Oh, S. K., Kim, K. W. & Choi, D. A common plant cell-wall protein  
810 HyPRP1 has dual roles as a positive regulator of cell death and a negative regulator of basal  
811 defense against pathogens. *Plant J* **69**, 755-768, doi:10.1111/j.1365-313X.2011.04828.x  
812 (2012).
- 813
